# Supplementary material for: The Effect of Forage-to-Concentrate Ratio on Schizochytrium spp.-Supplemented Goats: Modifying Rumen Microbiota
Source: MDPI journal article supplement (doi:10.3390/ani11092746), 2021-09-20
Supplement: s1 [file s1]

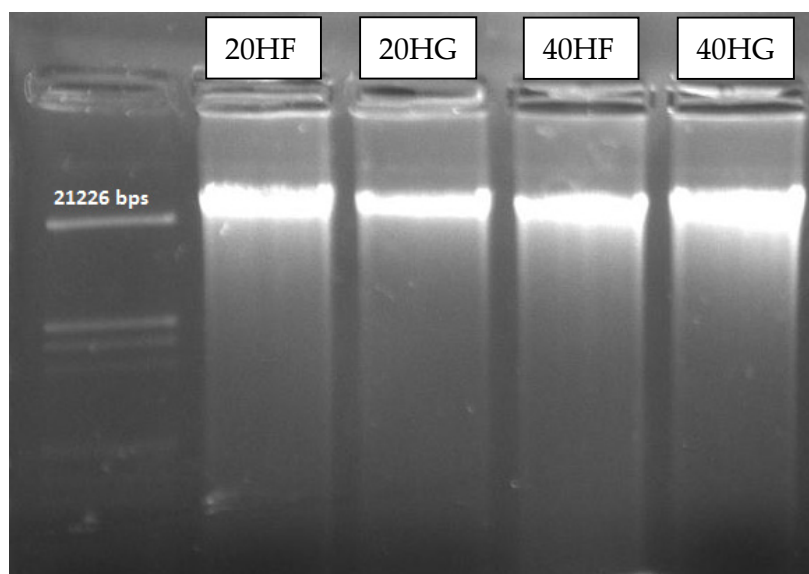

**Figure S1.** DNA quality of samples used for Ion Torrent.

20HF (22 DNA samples pooled: 11 goats x 2 sampling time); 20g *Schizochytrium spp* and high forage diet (60:40); 20HG (22 DNA samples pooled: 11 goats x 2 sampling time); 20g *Schizochytrium spp* and high grain diet (40:60); 40HF (22 DNA samples pooled: 11 goats x 2 sampling time); 40g *Schizochytrium spp* and high forage diet (60:40); 40HG (22 DNA samples pooled: 11 goats x 2 sampling time); 40g *Schizochytrium spp* and high grain diet (40:60).

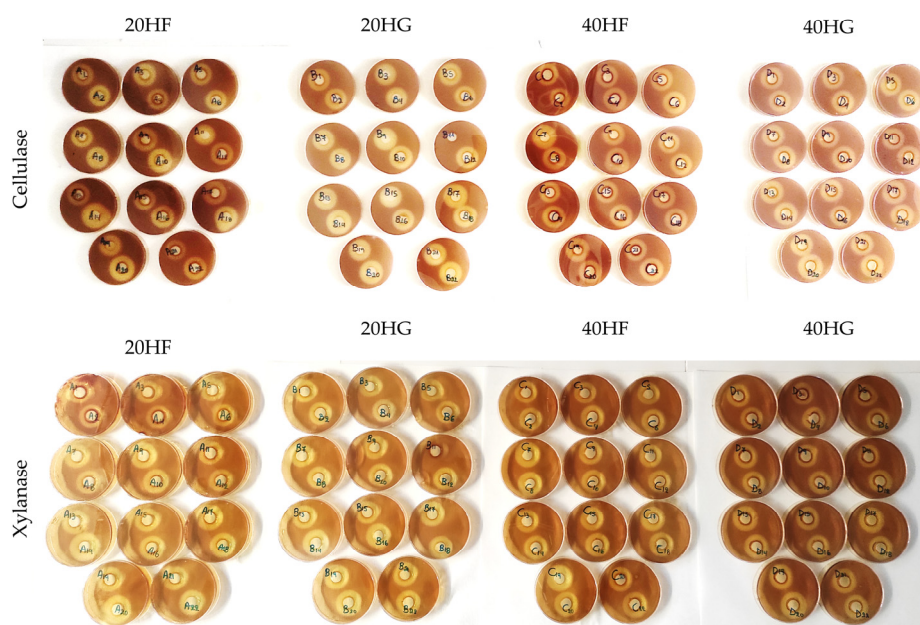

**Figure S2.** Cellulase and Xylanase enzymatic activity using the petri method.

## 20HF

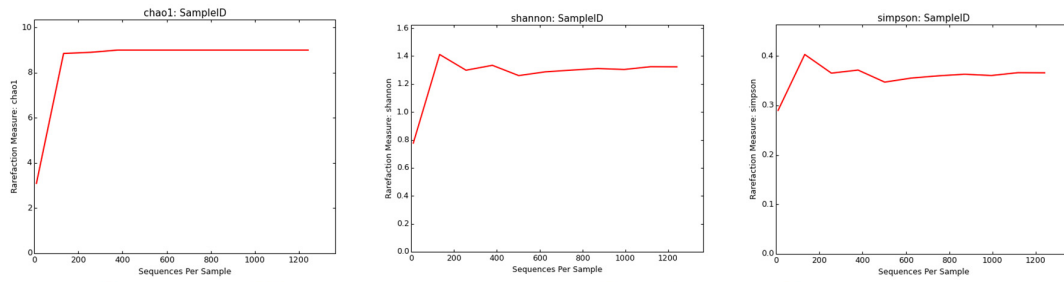

| SampleID         | Seqs/Sample | chao1 Ave. | chao1 Err. | observed_species Ave. | observed_species Err. | shannon Ave. | shannon Err. | simpson Ave. | simpson Err. |
|------------------|-------------|------------|------------|-----------------------|-----------------------|--------------|--------------|--------------|--------------|
| S001_16S002S1_v1 | 10.0        | 3.100      | nan        | 2.600                 | nan                   | 0.778        | nan          | 0.290        | nan          |
| S001_16S002S1_v1 | 133.0       | 8.850      | nan        | 8.500                 | nan                   | 1.411        | nan          | 0.403        | nan          |
| S001_16S002S1_v1 | 256.0       | 8.900      | nan        | 8.900                 | nan                   | 1.299        | nan          | 0.365        | nan          |
| S001_16S002S1_v1 | 379.0       | 9.000      | nan        | 9.000                 | nan                   | 1.334        | nan          | 0.371        | nan          |
| S001_16S002S1_v1 | 502.0       | 9.000      | nan        | 9.000                 | nan                   | 1.261        | nan          | 0.347        | nan          |
| S001_16S002S1_v1 | 625.0       | 9.000      | nan        | 9.000                 | nan                   | 1.287        | nan          | 0.355        | nan          |
| S001_16S002S1_v1 | 748.0       | 9.000      | nan        | 9.000                 | nan                   | 1.300        | nan          | 0.360        | nan          |
| S001_16S002S1_v1 | 871.0       | 9.000      | nan        | 9.000                 | nan                   | 1.311        | nan          | 0.363        | nan          |
| S001_16S002S1_v1 | 994.0       | 9.000      | nan        | 9.000                 | nan                   | 1.304        | nan          | 0.360        | nan          |
| S001_16S002S1_v1 | 1117.0      | 9.000      | nan        | 9.000                 | nan                   | 1.324        | nan          | 0.366        | nan          |
| S001_16S002S1_v1 | 1240.0      | 9.000      | nan        | 9.000                 | nan                   | 1.323        | nan          | 0.366        | nan          |

## 20HG

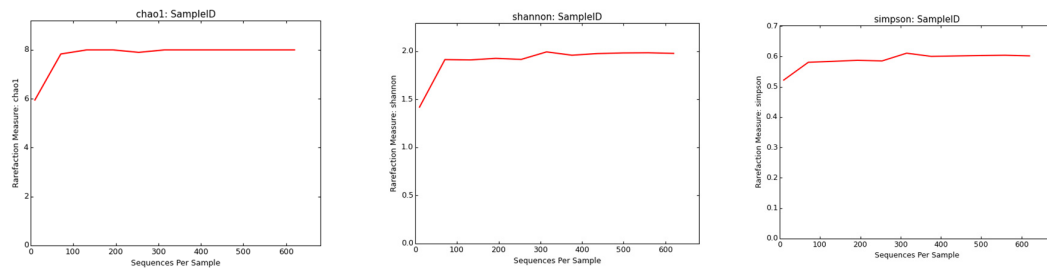

| SampleID         | Seqs/Sample | chao1 Ave. | chao1 Err. | observed_species Ave. | observed_species Err. | shannon Ave. | shannon Err. | simpson Ave. | simpson Err. |
|------------------|-------------|------------|------------|-----------------------|-----------------------|--------------|--------------|--------------|--------------|
| S001_16S002S2_v1 | 10.0        | 5.950      | nan        | 3.800                 | nan                   | 1.419        | nan          | 0.522        | nan          |
| S001_16S002S2_v1 | 71.0        | 7.833      | nan        | 7.800                 | nan                   | 1.914        | nan          | 0.581        | nan          |
| S001_16S002S2_v1 | 132.0       | 8.000      | nan        | 8.000                 | nan                   | 1.910        | nan          | 0.584        | nan          |
| S001_16S002S2_v1 | 193.0       | 8.000      | nan        | 8.000                 | nan                   | 1.926        | nan          | 0.587        | nan          |
| S001_16S002S2_v1 | 254.0       | 7.900      | nan        | 7.900                 | nan                   | 1.915        | nan          | 0.585        | nan          |
| S001_16S002S2_v1 | 315.0       | 8.000      | nan        | 8.000                 | nan                   | 1.994        | nan          | 0.610        | nan          |
| S001_16S002S2_v1 | 376.0       | 8.000      | nan        | 8.000                 | nan                   | 1.959        | nan          | 0.600        | nan          |
| S001_16S002S2_v1 | 437.0       | 8.000      | nan        | 8.000                 | nan                   | 1.976        | nan          | 0.601        | nan          |
| S001_16S002S2_v1 | 498.0       | 8.000      | nan        | 8.000                 | nan                   | 1.983        | nan          | 0.603        | nan          |
| S001_16S002S2_v1 | 559.0       | 8.000      | nan        | 8.000                 | nan                   | 1.984        | nan          | 0.604        | nan          |
| S001_16S002S2_v1 | 620.0       | 8.000      | nan        | 8.000                 | nan                   | 1.978        | nan          | 0.602        | nan          |

## 40HF

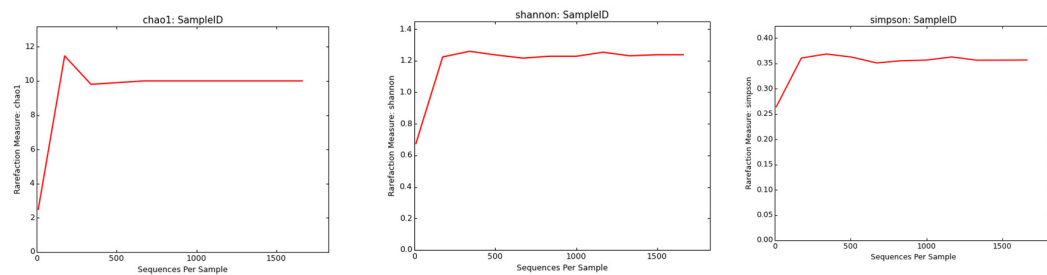

| SampleID         | Seqs/Sample | chao1 Ave. | chao1 Err. | observed_species Ave. | observed_species Err. | shannon Ave. | shannon Err. | simpson Ave. | simpson Err. |
|------------------|-------------|------------|------------|-----------------------|-----------------------|--------------|--------------|--------------|--------------|
| S001_16S002S3_y1 | 10.0        | 2.500      | nan        | 2.300                 | nan                   | 0.676        | nan          | 0.264        | nan          |
| S001_16S002S3_y1 | 175.0       | 11.462     | nan        | 9.700                 | nan                   | 1.224        | nan          | 0.360        | nan          |
| S001_16S002S3_y1 | 340.0       | 9.800      | nan        | 9.800                 | nan                   | 1.260        | nan          | 0.368        | nan          |
| S001_16S002S3_y1 | 505.0       | 9.900      | nan        | 9.900                 | nan                   | 1.236        | nan          | 0.362        | nan          |
| S001_16S002S3_y1 | 670.0       | 10.000     | nan        | 10.000                | nan                   | 1.216        | nan          | 0.351        | nan          |
| S001_16S002S3_y1 | 835.0       | 10.000     | nan        | 10.000                | nan                   | 1.228        | nan          | 0.355        | nan          |
| S001_16S002S3_y1 | 1000.0      | 10.000     | nan        | 10.000                | nan                   | 1.228        | nan          | 0.356        | nan          |
| S001_16S002S3_y1 | 1165.0      | 10.000     | nan        | 10.000                | nan                   | 1.253        | nan          | 0.363        | nan          |
| S001_16S002S3_y1 | 1330.0      | 10.000     | nan        | 10.000                | nan                   | 1.231        | nan          | 0.356        | nan          |
| S001_16S002S3_y1 | 1495.0      | 10.000     | nan        | 10.000                | nan                   | 1.237        | nan          | 0.356        | nan          |
| S001_16S002S3_y1 | 1660.0      | 10.000     | nan        | 10.000                | nan                   | 1.238        | nan          | 0.356        | nan          |

## 40HG

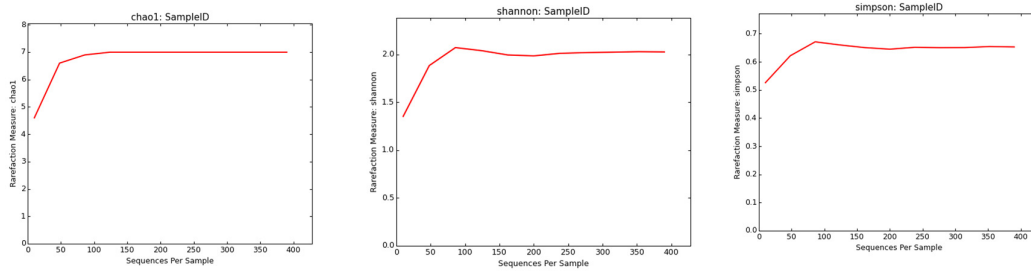

| SampleID         | Seqs/Sample | chao1 Ave. | chao1 Err. | observed_species Ave. | observed_species Err. | shannon Ave. | shannon Err. | simpson Ave. | simpson Err. |
|------------------|-------------|------------|------------|-----------------------|-----------------------|--------------|--------------|--------------|--------------|
| S001_16S002S4_y1 | 10.0        | 4.600      | nan        | 3.400                 | nan                   | 1.353        | nan          | 0.526        | nan          |
| S001_16S002S4_y1 | 48.0        | 6.600      | nan        | 6.400                 | nan                   | 1.884        | nan          | 0.622        | nan          |
| S001_16S002S4_y1 | 86.0        | 6.900      | nan        | 6.900                 | nan                   | 2.072        | nan          | 0.671        | nan          |
| S001_16S002S4_y1 | 124.0       | 7.000      | nan        | 7.000                 | nan                   | 2.040        | nan          | 0.660        | nan          |
| S001_16S002S4_y1 | 162.0       | 7.000      | nan        | 7.000                 | nan                   | 1.995        | nan          | 0.651        | nan          |
| S001_16S002S4_y1 | 200.0       | 7.000      | nan        | 7.000                 | nan                   | 1.985        | nan          | 0.645        | nan          |
| S001_16S002S4_y1 | 238.0       | 7.000      | nan        | 7.000                 | nan                   | 2.012        | nan          | 0.652        | nan          |
| S001_16S002S4_y1 | 276.0       | 7.000      | nan        | 7.000                 | nan                   | 2.020        | nan          | 0.650        | nan          |
| S001_16S002S4_y1 | 314.0       | 7.000      | nan        | 7.000                 | nan                   | 2.024        | nan          | 0.651        | nan          |
| S001_16S002S4_y1 | 352.0       | 7.000      | nan        | 7.000                 | nan                   | 2.029        | nan          | 0.654        | nan          |
| S001_16S002S4_y1 | 390.0       | 7.000      | nan        | 7.000                 | nan                   | 2.027        | nan          | 0.653        | nan          |

**Figure S3.** Rarefaction curves and alpha diversity of the four dietary groups (20HF, 20HG, 40HF, and 40HG) at genera taxonomic level.

20HF (22 DNA samples pooled: 11 goats x 2 sampling time): 20g *Schizochytrium spp* and high forage diet (60:40); 20HG (22 DNA samples pooled: 11 goats x 2 sampling time): 20g *Schizochytrium spp* and high grain diet (40:60); 40HF (22 DNA samples pooled: 11 goats x 2 sampling time): 40g *Schizochytrium spp* and high forage diet (60:40); 40HG (22 DNA samples pooled: 11 goats x 2 sampling time): 40g *Schizochytrium spp* and high grain diet (40:60).

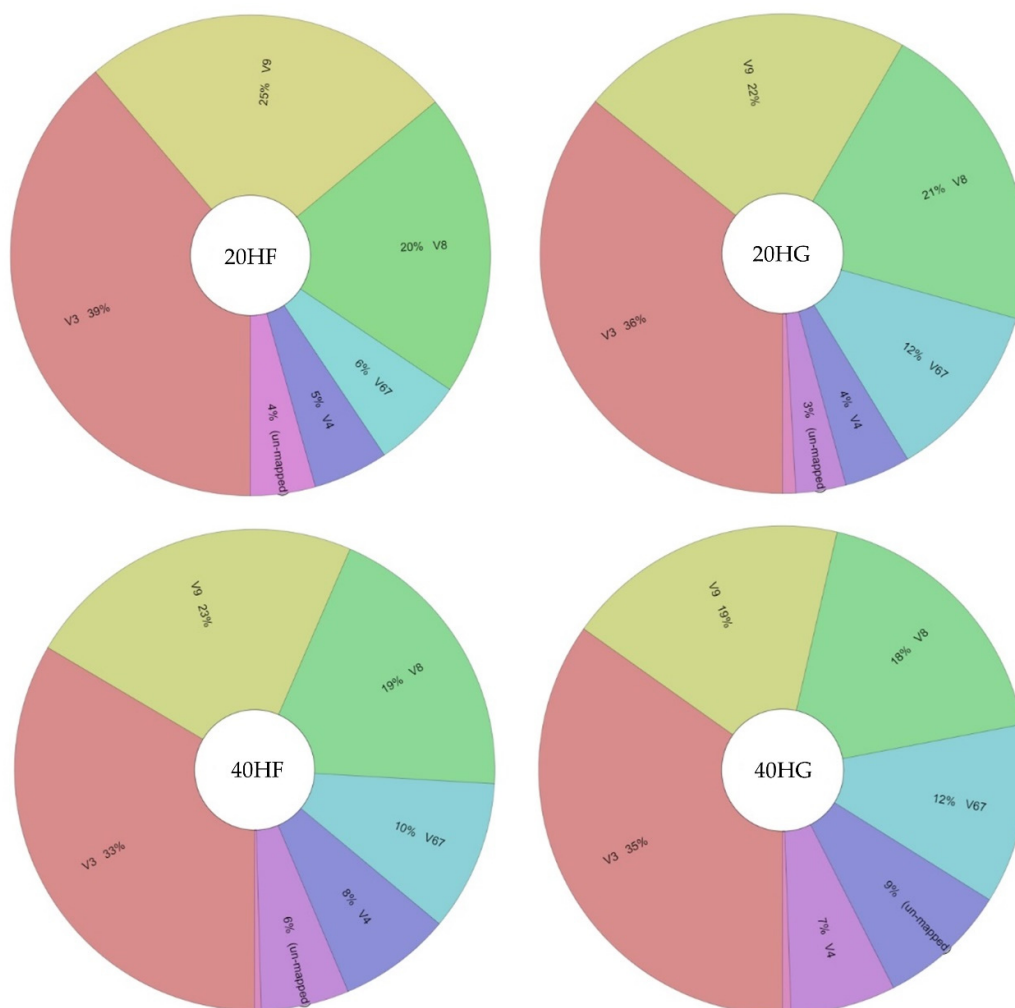

**Figure S4.** Primers coverage in the four samples of goats rumen.

20HF (22 DNA samples pooled: 11 goats x 2 sampling time): 20g *Schizochytrium spp* and high forage diet (60:40); 20HG (22 DNA samples pooled: 11 goats x 2 sampling time): 20g *Schizochytrium spp* and high grain diet (40:60); 40HF (22 DNA samples pooled: 11 goats x 2 sampling time): 40g *Schizochytrium spp* and high forage diet (60:40); 40HG (22 DNA samples pooled: 11 goats x 2 sampling time): 40g *Schizochytrium spp* and high grain diet (40:60).

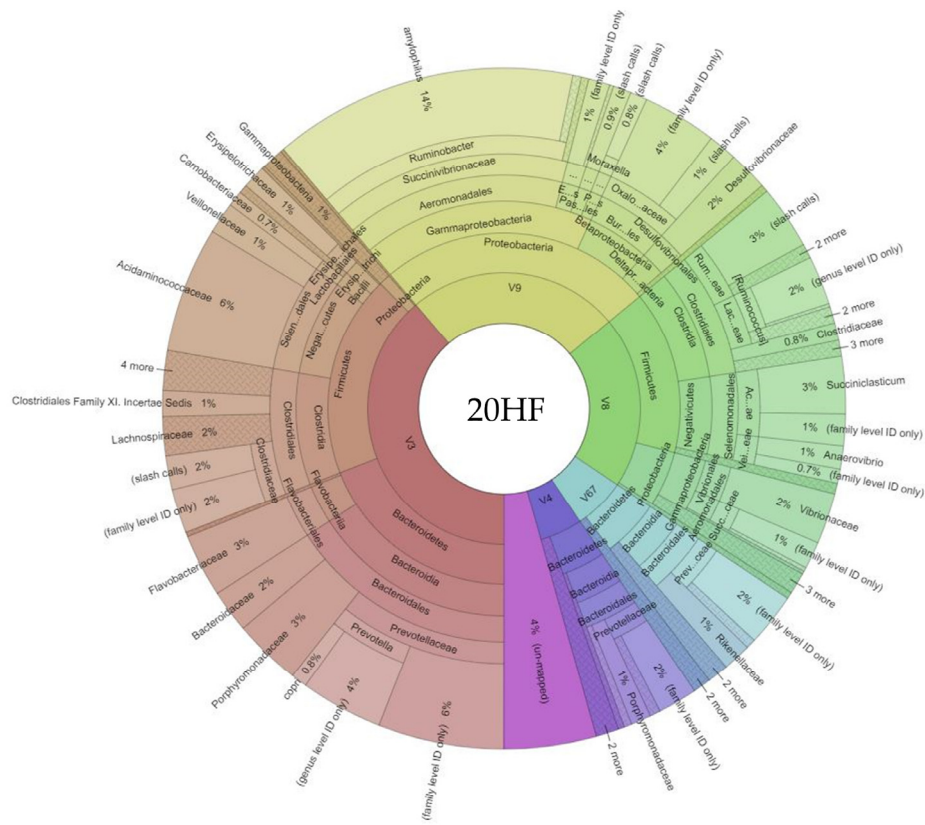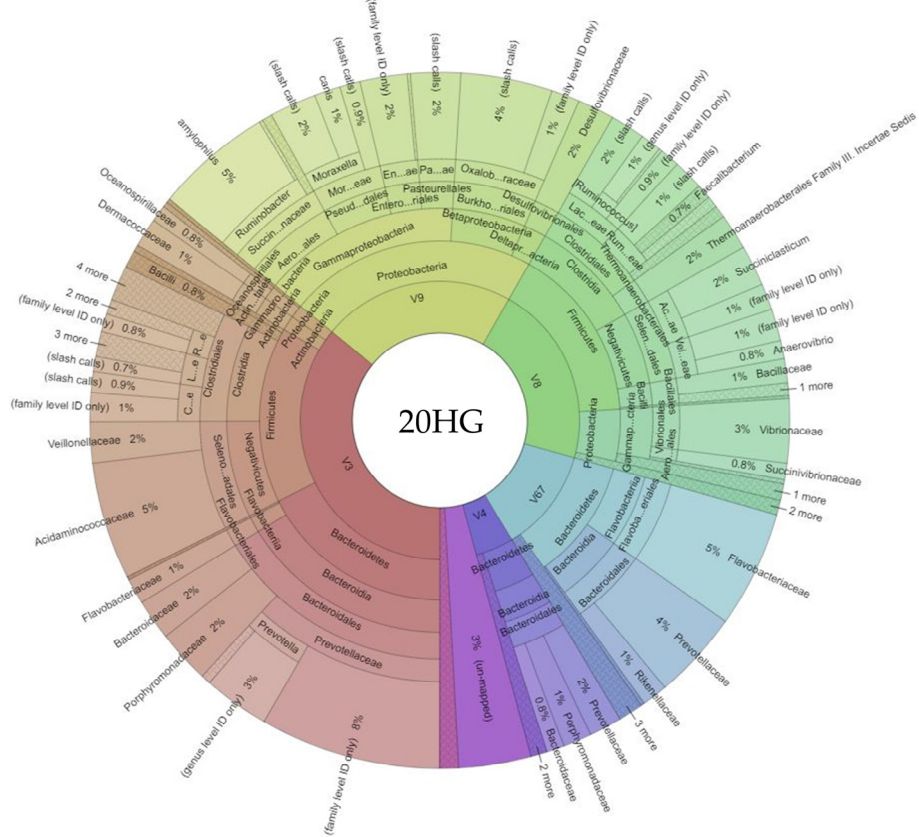



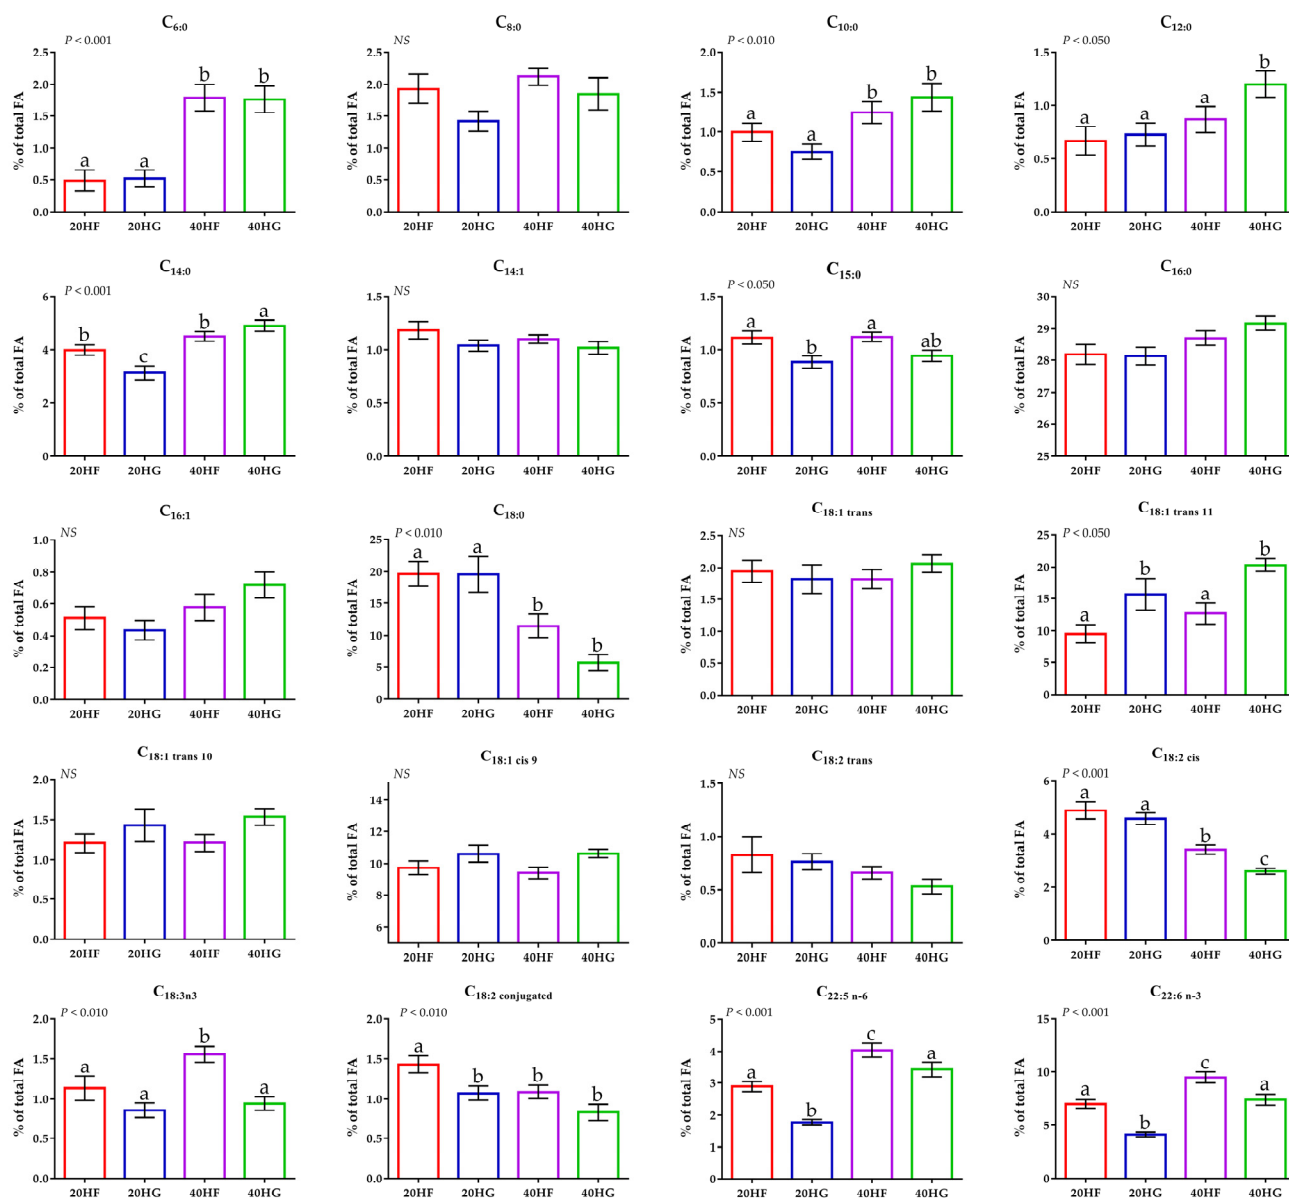

**Figure S6.** The mean individual fatty acids (FA) (% of total FA) in rumen fluid of goats fed diets (20HF, 20HG, 40HF, and 40HG) with different levels of *Schizochytrium* spp. (20 g and 40 g/goat/day) and two different forage to concentrate ratios (60:40 and 40:60) throughout the experimental period (21 and 42 experimental days) illustrated in column bars ( $\pm$ Standard Error of Means). Bars with different superscript (a, b, c) between dietary treatments differ significantly ( $p \leq 0.05$ ) while t is referred to P-value  $< 0.10$ , according to the Analysis of Variance (ANOVA) using a general linear model for repeated measures and Post hoc analysis was performed when appropriate using Tukey's multiple range test. 20HF (n = 11 goats): 20g *Schizochytrium* spp and high forage diet (60:40); 20HG (n = 11 goats): 20g *Schizochytrium* spp and high grain diet (40:60); 40HF (n = 11 goats): 40g *Schizochytrium* spp and high forage diet (60:40); 40HG (n = 11 goats): 40g *Schizochytrium* spp and high grain diet (40:60).

**Table S1.** Ingredients of concentrate (g/Kg) of the four diets.

|                                | Concentrates |       |      |       |
|--------------------------------|--------------|-------|------|-------|
|                                | 20HF         | 20HG  | 40HF | 40HG  |
| Maize grain                    | 387          | 331.6 | 357  | 326.3 |
| Barley grain                   | 200          | 200   | 200  | 200   |
| Wheat middlings                | 210          | 210   | 210  | 210   |
| Sunflower meal,                | 80           | 80    | 80   | 80    |
| Soybean meal                   | 60           | 120   | 70   | 110   |
| Calcium phosphate              | 15           | 15    | 15   | 15    |
| Calcium carbonate              | 5            | 5     | 5    | 5     |
| Salt                           | 3            | 3     | 3    | 3     |
| Mineral and vitamin            | 20           | 20    | 20   | 20    |
| <i>Schizochytrium</i> spp. (g) | 20           | 15.4  | 40   | 30.7  |

20HF: 20g *Schizochytrium* spp and high forage diet (60:40); 20HG: 20g *Schizochytrium* spp and high grain diet (40:60); 40HF: 40g *Schizochytrium* spp and high forage diet (60:40); 40HG: 40g *Schizochytrium* spp and high grain diet (40:60)

**Table S2.** Feed chemical composition (%).

|                                   | Concentrates |      |      |      | Forages     |             |
|-----------------------------------|--------------|------|------|------|-------------|-------------|
|                                   | 20HF         | 20HG | 40HF | 40HG | Alfalfa hay | Wheat straw |
| Dry Matter                        | 90.8         | 91.0 | 92.4 | 91.8 | 91.1        | 93.7        |
| Ash                               | 4.1          | 4.5  | 4.5  | 4.3  | 10.3        | 7.7         |
| Crude Protein                     | 13.6         | 16   | 13.6 | 16   | 14          | 2.5         |
| Ether Extract                     | 6.1          | 5.8  | 6.9  | 6.5  | 1.3         | 1.9         |
| Ash-free NDF treated with amylase | 21.9         | 22.5 | 21.8 | 22.4 | 41.5        | 71.5        |
| Acid Detergent Fiber              | 7.2          | 8.9  | 8.0  | 8.6  | 30.6        | 50.7        |
| Non Fibrous Carbohydrate          | 54.3         | 51.2 | 53.2 | 50.8 | 32.9        | 16.4        |
| Starch                            | 43.1         | 39.8 | 41.9 | 39.8 | 3.3         | 1.0         |

20HF: 20g *Schizochytrium* spp and high forage diet (60:40); 20HG: 20g *Schizochytrium* spp and high grain diet (40:60); 40HF: 40g *Schizochytrium* spp and high forage diet (60:40); 40HG: 40g *Schizochytrium* spp and high grain diet (40:60)

**Table S3.** Relative abundance of rumen fluid bacteriome of goats fed diets (20HF, 20HG, 40HF and 40HG) with different levels of *Schizochytrium spp.* (20 g and 40 g/goat/day) and two different forage to concentrate ratios (60:40 and 40:60) throughout the experimental period (21 and 42 experimental days) using Ion-Torrent sequencing.

| Phylum         | Class            | Order                     | Family                     | Genus                  | Species | 20HF  | 20HG  | 40HF  | 40HG  |
|----------------|------------------|---------------------------|----------------------------|------------------------|---------|-------|-------|-------|-------|
|                |                  |                           |                            |                        |         | 100   | 100   | 100   | 100   |
| Actinobacteria |                  |                           |                            |                        |         | 0.51  | 1.79  | 1.6   | 0.87  |
|                | Actinobacteria   |                           |                            |                        |         | 0.51  | 1.79  | 1.6   | 0.87  |
|                |                  | <i>Actinomycetales</i>    |                            |                        |         | 0.17  | 1.39  | 0.39  | 0.16  |
|                |                  |                           | <i>Corynebacteriaceae</i>  |                        |         | N.D.  | N.D.  | 0.15  | N.D.  |
|                |                  |                           | <i>Dermaococcaceae</i>     |                        |         | 0.17  | 1.39  | 0.24  | 0.16  |
|                |                  | <i>Bifidobacteriales</i>  |                            |                        |         | 0.34  | 0.4   | 1.21  | 0.7   |
|                |                  |                           | <i>Bifidobacteriaceae</i>  |                        |         | 0.34  | 0.4   | 1.21  | 0.7   |
|                |                  |                           |                            | <i>Bifidobacterium</i> |         | N.D.  | N.D.  | 0.1   | N.D.  |
| Bacteroidetes  |                  |                           |                            |                        |         | 29.66 | 33.75 | 34.08 | 36.5  |
|                | Bacteroidia      |                           |                            |                        |         | 24.94 | 26.03 | 28.87 | 31.95 |
|                |                  | <i>Bacteroidales</i>      |                            |                        |         | 24.94 | 26.03 | 28.87 | 31.95 |
|                |                  |                           | <i>Bacteroidaceae</i>      |                        |         | 2.5   | 2.82  | 2.11  | 1.34  |
|                |                  |                           | <i>Marinilabiliaceae</i>   |                        |         | N.D.  | N.D.  | N.D.  | 0.23  |
|                |                  |                           | <i>Porphyromonadaceae</i>  |                        |         | 4.35  | 3.9   | 2.82  | 2.03  |
|                |                  |                           | <i>Prevotellaceae</i>      |                        |         | 16.68 | 18.08 | 23.14 | 28.35 |
|                |                  |                           |                            | <i>Prevotella</i>      |         | 5.89  | 3.62  | 5.38  | 6.71  |
|                |                  |                           |                            | <i>copri</i>           |         | 0.8   | 0.46  | 0.4   | 0.36  |
|                |                  |                           | <i>Rikenellaceae</i>       |                        |         | 1.41  | 1.23  | 0.79  | N.D.  |
|                | Cytophagia       |                           |                            |                        |         | 0.15  | 0.22  | N.D.  | N.D.  |
|                |                  | <i>Cytophagales</i>       |                            |                        |         | 0.15  | 0.22  | N.D.  | N.D.  |
|                |                  |                           | <i>Cytophagaceae</i>       |                        |         | 0.15  | 0.22  | N.D.  | N.D.  |
|                | Flavobacteriia   |                           |                            |                        |         | 3.86  | 7.16  | 2.58  | 2.59  |
|                |                  | <i>Flavobacteriales</i>   |                            |                        |         | 3.86  | 7.16  | 2.58  | 2.59  |
|                |                  |                           | <i>Flavobacteriaceae</i>   |                        |         | 3.86  | 7.16  | 2.58  | 2.59  |
|                | Sphingobacteriia |                           |                            |                        |         | 0.71  | 0.34  | 2.63  | 1.96  |
|                |                  | <i>Sphingobacteriales</i> |                            |                        |         | 0.71  | 0.34  | 2.63  | 1.96  |
|                |                  |                           | <i>Sphingobacteriaceae</i> |                        |         | 0.71  | 0.34  | 2.63  | 1.96  |
| Firmicutes     |                  |                           |                            |                        |         | 36.30 | 33.66 | 24.1  | 32.30 |

|                 |                                                          |       |       |       |       |
|-----------------|----------------------------------------------------------|-------|-------|-------|-------|
| Bacilli         |                                                          | 1.36  | 2.58  | 0.83  | 0.83  |
|                 | <i>Bacillales</i>                                        | 0.58  | 1.97  | 0.25  | 0.83  |
|                 | <i>Bacillaceae</i>                                       | 0.32  | 1.13  | 0.13  | 0.16  |
|                 | <i>Staphylococcaceae</i>                                 | 0.26  | 0.85  | 0.12  | 0.67  |
|                 | <i>Lactobacillales</i>                                   | 0.78  | 0.61  | 0.58  | N.D.  |
|                 | <i>Carnobacteriaceae</i>                                 | 0.78  | 0.61  | 0.58  | N.D.  |
| Clostridia      |                                                          | 19.19 | 16.83 | 12.49 | 13.21 |
|                 | <i>Clostridiales</i>                                     | 19.19 | 15.1  | 12.49 | 13.21 |
|                 | <i>Christensenellaceae</i>                               | 0.64  | 0.19  | 0.36  | 0.34  |
|                 | <i>Clostridiaceae</i>                                    | 5.24  | 2.54  | 2.11  | 1.67  |
|                 | <i>Clostridiales Family XI. Incertae Sedis</i>           | 1.27  | 0.64  | 0.64  | 0.44  |
|                 | <i>Eubacteriaceae</i>                                    | 0.49  | 0.52  | 1.38  | 0.93  |
|                 | <i>Gracilibacteraceae</i>                                | 0.17  | 0.34  | 0.11  | N.D.  |
|                 | <i>Hellobacteriaceae</i>                                 | N.D.  | N.D.  | N.D.  | 0.26  |
|                 | <i>Lachnospiraceae</i>                                   | 6.04  | 6.01  | 3.92  | 4.86  |
|                 | <i>Butyrivibrio</i>                                      | 1.1   | 0.25  | 0.66  | 2.39  |
|                 | <i>fibrisolvens</i>                                      | 0.35  | N.D.  | 0.27  | 0.44  |
|                 | <i>proteoclasticus</i>                                   | 0.58  | N.D.  | 0.17  | N.D.  |
|                 | <i>Coprococcus</i>                                       | 0.64  | 0.4   | 0.24  | 0.29  |
|                 | <i>eutactus</i>                                          | 0.64  | 0.4   | 0.24  | 0.29  |
|                 | <i>Lachnospira</i>                                       | 0.2   | N.D.  | N.D.  | N.D.  |
|                 | <i>[Ruminococcus]</i>                                    | 2.59  | 1.16  | 0.78  | 0.38  |
|                 | <i>gnavus</i>                                            | 0.17  | 0.15  | N.D.  | N.D.  |
|                 | <i>Oscillospiraceae</i>                                  | 0.32  | 0.21  | 0.42  | N.D.  |
|                 | <i>Peptococcaceae</i>                                    | 0.17  | N.D.  | 0.1   | N.D.  |
|                 | <i>Ruminococcaceae</i>                                   | 4.54  | 4.29  | 2.83  | 3.81  |
|                 | <i>Faecalibacterium</i>                                  | 0.2   | 0.7   | 0.45  | 2.37  |
|                 | <i>prausnitzii</i>                                       | 0.2   | 0.53  | 0.24  | N.D.  |
|                 | <i>Ruminococcus</i>                                      | 1.18  | 0.74  | 1.28  | 0.16  |
|                 | <i>flavefaciens</i>                                      | 0.84  | 0.36  | 0.11  | 0.16  |
|                 | <i>Veillonellaceae</i>                                   | 0.31  | 0.37  | 0.62  | 0.88  |
|                 | <i>Thermoanaerobacterales</i>                            | N.D.  | 1.74  | N.D.  | N.D.  |
|                 | <i>Thermoanaerobacterales Family III. Incertae Sedis</i> | N.D.  | 1.74  | N.D.  | N.D.  |
| Erysipelotrichi |                                                          | 1.55  | 0.47  | 0.54  | 0.61  |

|                       |                            |       |       |       |       |
|-----------------------|----------------------------|-------|-------|-------|-------|
|                       | <i>Erysipelotrichales</i>  | 1.55  | 0.47  | 0.54  | 0.61  |
|                       | <i>Erysipelotrichaceae</i> | 1.55  | 0.47  | 0.54  | 0.61  |
| Erysipelotrichia      |                            | 0.15  | N.D.  | 0.41  | 0.93  |
|                       | <i>Erysipelotrichales</i>  | 0.15  | N.D.  | 0.41  | 0.93  |
|                       | <i>Erysipelotrichaceae</i> | 0.15  | N.D.  | 0.41  | 0.93  |
| Negativicutes         |                            | 14.04 | 13.78 | 9.83  | 16.71 |
|                       | <i>Selenomonadales</i>     | 14.04 | 13.78 | 9.83  | 16.71 |
|                       | <i>Acidaminococcaceae</i>  | 10.64 | 8.85  | 7.97  | 10.79 |
|                       | <i>Succiniclasticum</i>    | 2.82  | 1.97  | 3.36  | 4.26  |
|                       | <i>ruminis</i>             | N.D.  | N.D.  | 0.11  | 0.36  |
|                       | <i>Veillonellaceae</i>     | 3.4   | 4.92  | 1.86  | 5.93  |
|                       | <i>Anaerovibrio</i>        | 1.13  | 0.87  | 0.38  | 1.31  |
|                       | <i>Selenomonas</i>         | N.D.  | N.D.  | 0.13  | N.D.  |
| Proteobacteria        |                            | 33.34 | 29.93 | 38.82 | 27.25 |
| Alphaproteobacteria   |                            | 0.61  | N.D.  | 0.09  | 0.56  |
|                       | <i>Sphingomonadales</i>    | 0.61  | N.D.  | 0.09  | 0.38  |
|                       | <i>Erythrobacteraceae</i>  | 0.61  | N.D.  | 0.09  | 0.38  |
|                       | <i>Sneathiellales</i>      | N.D.  | N.D.  | N.D.  | 0.18  |
|                       | <i>Sneathiellaceae</i>     | N.D.  | N.D.  | N.D.  | 0.18  |
| Betaproteobacteria    |                            | 5.1   | 5.74  | 5.8   | 5.63  |
|                       | <i>Burkholderiales</i>     | 5.1   | 5.74  | 5.69  | 5.47  |
|                       | <i>Oxalobacteraceae</i>    | 5.1   | 5.74  | 5.69  | 5.47  |
|                       | <i>Neisseriales</i>        | N.D.  | N.D.  | N.D.  | 0.16  |
|                       | <i>Neisseriaceae</i>       | N.D.  | N.D.  | N.D.  | 0.16  |
|                       | <i>Rhodocyclales</i>       | N.D.  | N.D.  | 0.11  | N.D.  |
|                       | <i>Rhodocyclaceae</i>      | N.D.  | N.D.  | 0.11  | N.D.  |
| Deltaproteobacteria   |                            | 2.61  | 2.73  | 2.92  | 4.35  |
|                       | <i>Desulfovibrionales</i>  | 2.13  | 2.58  | 2.6   | 3.86  |
|                       | <i>Desulfovibrionaceae</i> | 2.13  | 2.58  | 2.6   | 3.86  |
|                       | <i>Desulfovibrio</i>       | N.D.  | N.D.  | 0.09  | N.D.  |
|                       | <i>D168</i>                | N.D.  | N.D.  | 0.09  | N.D.  |
|                       | <i>Syntrophobacterales</i> | 0.48  | 0.15  | 0.31  | 0.49  |
|                       | <i>Syntrophaceae</i>       | 0.48  | 0.15  | 0.31  | 0.49  |
| Epsilonproteobacteria |                            | 0.18  | N.D.  | N.D.  | N.D.  |

|                     |                                |       |       |       |       |
|---------------------|--------------------------------|-------|-------|-------|-------|
|                     | <i>Campylobacteriales</i>      | 0.18  | N.D.  | N.D.  | N.D.  |
|                     | <i>Campylobacteraceae</i>      | 0.18  | N.D.  | N.D.  | N.D.  |
| Gammaproteobacteria |                                | 24.83 | 21.46 | 30.01 | 16.71 |
|                     | <i>Aeromonadales</i>           | 17.41 | 7.06  | 15.26 | 10.44 |
|                     | <i>Succinivibrionaceae</i>     | 17.41 | 7.06  | 15.25 | 10.44 |
|                     | <i>Ruminobacter</i>            | 15.5  | 5.78  | 12.66 | 4.86  |
|                     | <i>amylophilus</i>             | 15.07 | 5.61  | 12.21 | 3.44  |
|                     | <i>Succinimonas</i>            | 0.37  | 0.49  | 1.52  | 1.33  |
|                     | <i>amylolytica</i>             | 0.37  | 0.49  | 1.52  | 1.33  |
|                     | <i>Succinivibrio</i>           | 0.2   | N.D.  | 0.11  | 0.39  |
|                     | <i>Enterobacteriales</i>       | 1.47  | 2.4   | 0.14  | N.D.  |
|                     | <i>Enterobacteriaceae</i>      | 1.47  | 2.4   | 0.14  | N.D.  |
|                     | <i>Oceanospirillales</i>       | 0.66  | 0.8   | 1.78  | N.D.  |
|                     | <i>Oceanospirillaceae</i>      | 0.66  | 0.8   | 1.78  | N.D.  |
|                     | <i>Orbales</i>                 | 0.43  | 0.21  | 1.64  | N.D.  |
|                     | <i>Orbaceae</i>                | 0.43  | 0.21  | 1.64  | N.D.  |
|                     | <i>Pasteurellales</i>          | 0.89  | 2.65  | 1.17  | 0.64  |
|                     | <i>Pasteurellaceae</i>         | 0.89  | 2.65  | 1.17  | 0.64  |
|                     | <i>Pseudomonadales</i>         | 0.84  | 4.64  | 1.67  | 2.93  |
|                     | <i>Moraxellaceae</i>           | 0.84  | 4.64  | 1.67  | 2.93  |
|                     | <i>Moraxella</i>               | 0.84  | 3.49  | 1.54  | 2.41  |
|                     | <i>canis</i>                   | N.D.  | 1.25  | N.D.  | N.D.  |
|                     | <i>Vibrionales</i>             | 2.97  | 3.34  | 8.35  | 2.54  |
|                     | <i>Vibrionaceae</i>            | 2.97  | 3.34  | 8.35  | 2.54  |
|                     | <i>Xanthomonadales</i>         | 0.15  | 0.36  | N.D.  | 0.16  |
|                     | <i>Xanthomonadaceae</i>        | 0.15  | 0.36  | N.D.  | 0.16  |
| Spirochaetes        |                                | N.D.  | N.D.  | N.D.  | 0.16  |
|                     | <i>Spirochaetia</i>            | N.D.  | N.D.  | N.D.  | 0.16  |
|                     | <i>Spirochaetales</i>          | N.D.  | N.D.  | N.D.  | 0.16  |
|                     | <i>Spirochaetaceae</i>         | N.D.  | N.D.  | N.D.  | 0.16  |
| Synergistetes       |                                | 0.2   | 0.86  | 1.15  | 2.5   |
|                     | <i>Synergistia</i>             | 0.2   | 0.86  | 1.15  | 2.5   |
|                     | <i>Synergistales</i>           | 0.2   | 0.86  | 1.15  | 2.5   |
|                     | <i>Dethiosulfovibrionaceae</i> | N.D.  | N.D.  | N.D.  | 0.36  |

|                 |                            |      |      |      |      |
|-----------------|----------------------------|------|------|------|------|
|                 | <i>Synergistaceae</i>      | 0.2  | 0.86 | 1.15 | 2.14 |
| Tenericutes     |                            | N.D. | N.D. | 0.14 | N.D. |
|                 | Mollicutes                 | N.D. | N.D. | 0.14 | N.D. |
|                 | <i>Entomoplasmatales</i>   | N.D. | N.D. | 0.14 | N.D. |
|                 | <i>Entomoplasmataceae</i>  | N.D. | N.D. | 0.14 | N.D. |
| Verrucomicrobia |                            | N.D. | N.D. | 0.11 | 0.41 |
|                 | Verrucomicrobiae           | N.D. | N.D. | 0.11 | 0.41 |
|                 | <i>Verrucomicrobiales</i>  | N.D. | N.D. | 0.11 | 0.23 |
|                 | <i>Verrucomicrobiaceae</i> | N.D. | N.D. | 0.11 | 0.23 |
|                 | <i>Puniceicoccales</i>     | N.D. | N.D. | N.D. | 0.18 |
|                 | <i>Puniceicoccaceae</i>    | N.D. | N.D. | N.D. | 0.18 |

20HF (22 DNA samples pooled: 11 goats x 2 sampling time): 20g *Schizochytrium spp* and high forage diet (60:40); 20HG (22 DNA samples pooled: 11 goats x 2 sampling time): 20g *Schizochytrium spp* and high grain diet (40:60); 40HF (22 DNA samples pooled: 11 goats x 2 sampling time): 40g *Schizochytrium spp* and high forage diet (60:40); 40HG (22 DNA samples pooled: 11 goats x 2 sampling time): 40g *Schizochytrium spp* and high grain diet (40:60).

**Table S4.** Relative abundance of several microorganisms (to the total bacterial 16s DNA) in the rumen fluid of goats fed diets (20HF, 20HG, 40HF, and 40HG) with different levels of microalgae *Schizochytrium* spp (20 g and 40 g/day/goat) and two different forage to concentrate ratios (60:40 and 40:60) throughout the experimental period (21th and 42th experimental day) using a GLM model for repeated measure.

|                                     | Dietary treatment (D) |                        |                       |                       |        | Sampling time (S)    |                     |        | Effect |     |       |
|-------------------------------------|-----------------------|------------------------|-----------------------|-----------------------|--------|----------------------|---------------------|--------|--------|-----|-------|
|                                     | 20HF                  | 20HG                   | 40HF                  | 40HG                  | SEM    | 21                   | 42                  | SEM    | D      | T   | D x T |
| Bacteroidetes                       | 0.355 <sup>a</sup>    | 0.270 <sup>a</sup>     | 0.355 <sup>a</sup>    | 0.445 <sup>b</sup>    | 0.032  | 0.319 <sup>a</sup>   | 0.393 <sup>b</sup>  | 0.021  | **     | *   | NS    |
| Firmicutes                          | 0.361                 | 0.291                  | 0.284                 | 0.302                 | 0.035  | 0.263 <sup>a</sup>   | 0.356 <sup>b</sup>  | 0.025  | NS     | *   | *     |
| Archaea                             | 0.011                 | 0.013                  | 0.010                 | 0.014                 | 0.002  | 0.011                | 0.013               | 0.001  | NS     | NS  | ***   |
| Protozoa                            | 0.006 <sup>b</sup>    | 0.007 <sup>a</sup>     | 0.005 <sup>b</sup>    | 0.006 <sup>b</sup>    | <0.001 | 0.007                | 0.005               | <0.001 | **     | *   | NS    |
| <i>Entodinium</i> spp               | 0.003 <sup>b</sup>    | 0.005 <sup>a</sup>     | 0.005 <sup>ab</sup>   | 0.006 <sup>a</sup>    | 0.001  | 0.006                | 0.004               | 0.001  | *      | NS  | t     |
| Total fungi                         | 0.0002                | 0.0002                 | 0.0002                | 0.00012               | <0.001 | 0.00017              | 0.00019             | <0.001 | NS     | NS  | NS    |
| Neocallimastigales                  | 0.00014 <sup>b</sup>  | 0.00012 <sup>b</sup>   | 0.00019 <sup>a</sup>  | 0.00012 <sup>b</sup>  | <0.001 | 0.00014              | 0.00014             | <0.001 | *      | NS  | NS    |
| Methanogen                          | 0.005 <sup>a</sup>    | 0.006 <sup>a</sup>     | 0.010 <sup>b</sup>    | 0.008 <sup>ab</sup>   | 0.001  | 0.009 <sup>a</sup>   | 0.005 <sup>b</sup>  | 0.001  | *      | **  | NS    |
| Methanomassiliicoccales             | 0.0017 <sup>a</sup>   | 0.0015 <sup>a</sup>    | 0.0025 <sup>b</sup>   | 0.0025 <sup>b</sup>   | <0.001 | 0.0025 <sup>a</sup>  | 0.0015 <sup>b</sup> | <0.001 | *      | *** | NS    |
| <i>Eubacterium ruminantium</i>      | 0.0029 <sup>a</sup>   | 0.0016 <sup>ab</sup>   | 0.0019 <sup>a</sup>   | 0.0005 <sup>b</sup>   | 0.001  | 0.0015               | 0.0020              | <0.001 | *      | NS  | *     |
| <i>Butyrivibrio fibrisolvens</i>    | 0.055 <sup>a</sup>    | 0.059 <sup>a</sup>     | 0.040 <sup>b</sup>    | 0.039 <sup>b</sup>    | 0.005  | 0.037 <sup>a</sup>   | 0.059 <sup>b</sup>  | 0.003  | **     | *** | *     |
| <i>Butyrivibrio proteoclasticus</i> | 0.017                 | 0.015                  | 0.010                 | 0.012                 | 0.003  | 0.011                | 0.015               | 0.001  | NS     | *   | NS    |
| <i>Ruminococcus flavefaciens</i>    | 0.0016 <sup>a</sup>   | 0.0008 <sup>ab</sup>   | 0.0006 <sup>b</sup>   | 0.0005 <sup>b</sup>   | <0.001 | 0.0008               | 0.0010              | <0.001 | *      | NS  | NS    |
| <i>Fibrobacter succinogenes</i>     | 0.014                 | 0.009                  | 0.018                 | 0.013                 | 0.003  | 0.016 <sup>a</sup>   | 0.011 <sup>b</sup>  | 0.002  | NS     | *   | NS    |
| <i>Ruminococcus albus</i>           | 0.0005                | 0.0003                 | 0.0002                | 0.0002                | <0.001 | 0.0003               | 0.0003              | <0.001 | NS     | NS  | t     |
| <i>Ruminobacter amylophilus</i>     | 0.030 <sup>t</sup>    | 0.018 <sup>a</sup>     | 0.063 <sup>b</sup>    | 0.027 <sup>t</sup>    | 0.015  | 0.045 <sup>a</sup>   | 0.024 <sup>b</sup>  | 0.007  | *      | *   | NS    |
| <i>Streptococcus bovis</i>          | 0.000004 <sup>a</sup> | 0.0000035 <sup>a</sup> | 0.000001 <sup>b</sup> | 0.000001 <sup>b</sup> | <0.001 | 0.0000025            | 0.0000023           | <0.001 | *      | NS  | NS    |
| <i>Selenomonas ruminantium</i>      | 0.011                 | 0.011                  | 0.009                 | 0.012                 | 0.001  | 0.010                | 0.011               | 0.001  | NS     | NS  | **    |
| <i>Prevotella</i> spp               | 0.118                 | 0.109                  | 0.112                 | 0.136                 | 0.011  | 0.105 <sup>a</sup>   | 0.133 <sup>b</sup>  | 0.007  | NS     | **  | NS    |
| <i>Prevotella ruminicola</i>        | 0.054 <sup>ab</sup>   | 0.041 <sup>a</sup>     | 0.042 <sup>a</sup>    | 0.064 <sup>b</sup>    | 0.006  | 0.044 <sup>a</sup>   | 0.056 <sup>b</sup>  | 0.004  | *      | t   | NS    |
| <i>Prevotella brevis</i>            | 0.025 <sup>a</sup>    | 0.025 <sup>a</sup>     | 0.058 <sup>b</sup>    | 0.053 <sup>b</sup>    | 0.008  | 0.033                | 0.047               | 0.005  | **     | t   | NS    |
| <i>Methanosphaera stadtmanae</i>    | 0.0011                | 0.0012                 | 0.00095               | 0.00081               | <0.001 | 0.00078 <sup>a</sup> | 0.0012 <sup>b</sup> | <0.001 | NS     | **  | *     |
| <i>Methanobrevibacter</i> spp.      | 0.0020 <sup>a</sup>   | 0.0025 <sup>a</sup>    | 0.0006 <sup>b</sup>   | 0.0009 <sup>b</sup>   | <0.001 | 0.0006 <sup>a</sup>  | 0.0024 <sup>b</sup> | <0.001 | **     | *** | **    |
| Methanobacteriales                  | 0.0016 <sup>a</sup>   | 0.0024 <sup>b</sup>    | 0.0008 <sup>c</sup>   | 0.0015 <sup>a</sup>   | <0.001 | 0.0009 <sup>a</sup>  | 0.0022 <sup>b</sup> | <0.001 | ***    | *** | ***   |

Means with different superscript letters (a, b) between dietary groups and sampling time differ significantly; \* p < 0.05, \*\* p < 0.01, \*\*\* p < 0.001, t = trend p < 0.10.

<sup>a</sup> SEM: Standard error of the means. 20HF (n = 11 goats): 20g *Schizochytrium* spp and high forage diet (60:40); 20HG (n = 11 goats): 20g *Schizochytrium* spp and high grain diet (40:60); 40HF (n = 11 goats): 40g *Schizochytrium* spp and high forage diet (60:40); 40HG (n = 11 goats): 40g *Schizochytrium* spp and high grain diet (40:60).

**Table S5.** Relative abundance of several microorganisms several microorganisms (to the total bacterial 16s DNA) in the rumen fluid of goats fed diets (20HF, 20HG, 40HF, and 40HG) with different levels of microalgae *Schizochytrium* spp (20 g and 40 g/day/goat) and two different forage to concentrate ratios (60:40 and 40:60) throughout the experimental period (21th and 42th experimental day) using a GLM model for three-way repeated measures.

|                                     | Dietary treatment (D) |                    |                    |                      |                    |                    | Sampling time (S)  |                    |                    | Effect |     |      |                    |       |     |         |
|-------------------------------------|-----------------------|--------------------|--------------------|----------------------|--------------------|--------------------|--------------------|--------------------|--------------------|--------|-----|------|--------------------|-------|-----|---------|
|                                     | Forage/Concentrate    |                    |                    | Algae level          |                    |                    | Sampling day       |                    |                    | Effect |     |      | Interaction effect |       |     |         |
|                                     | 60/40                 | 40/60              | SEM <sup>a</sup>   | 20g                  | 40g                | SEM <sup>a</sup>   | 21                 | 42                 | SEM <sup>a</sup>   | F/C    | ALG | TIME | F/C×A              | F/C×T | A×T | F/C×A×T |
| Bacteroidetes                       | 0.354                 | 0.358              | 0.024              | 0.312                | 0.400              | 0.032              | 0.321              | 0.391              | 0.035              | NS     | **  | t    | **                 | NS    | NS  | NS      |
| Firmicutes                          | 0.324                 | 0.297              | 0.029              | 0.326                | 0.295              | 0.036              | 0.266              | 0.355              | 0.037              | NS     | NS  | *    | NS                 | NS    | **  | NS      |
| Archaea                             | 0.011                 | 0.013              | 0.002              | 0.012                | 0.012              | 0.002              | 0.011              | 0.013              | 0.002              | NS     | NS  | NS   | NS                 | NS    | *** | NS      |
| Protozoa                            | 0.006                 | 0.007              | 0.0003             | 0.007                | 0.006              | 0.0005             | 0.007              | 0.006              | 0.0005             | *      | NS  | t    | NS                 | NS    | NS  | NS      |
| <i>Entodinium</i> spp               | 0.004                 | 0.006              | 0.001              | 0.004                | 0.005              | 0.001              | 0.006              | 0.004              | 0.001              | NS     | NS  | t    | NS                 | NS    | *   | NS      |
| Total fungi                         | 2×10 <sup>-4</sup>    | 2×10 <sup>-4</sup> | 2×10 <sup>-5</sup> | 2×10 <sup>-4</sup>   | 2×10 <sup>-4</sup> | 2×10 <sup>-5</sup> | 2×10 <sup>-4</sup> | 2×10 <sup>-4</sup> | 3×10 <sup>-5</sup> | NS     | NS  | NS   | NS                 | NS    | NS  | NS      |
| Neocallimastigales                  | 2×10 <sup>-4</sup>    | 1×10 <sup>-4</sup> | 2×10 <sup>-5</sup> | 1×10 <sup>-4</sup>   | 2×10 <sup>-4</sup> | 2×10 <sup>-5</sup> | 1×10 <sup>-4</sup> | 1×10 <sup>-4</sup> | 2×10 <sup>-5</sup> | t      | t   | NS   | NS                 | NS    | *   | NS      |
| Methanogen                          | 0.008                 | 0.007              | 0.001              | 0.005                | 0.009              | 0.001              | 0.009              | 0.005              | 0.001              | NS     | **  | **   | NS                 | NS    | NS  | NS      |
| Methanomassiliicoccales             | 0.002                 | 0.002              | 0.0002             | 0.002                | 0.003              | 0.0003             | 0.003              | 0.002              | 0.0003             | NS     | *** | ***  | NS                 | NS    | NS  | NS      |
| <i>Eubacterium ruminantium</i>      | 0.002                 | 0.001              | 0.0004             | 0.002                | 0.001              | 0.0005             | 0.002              | 0.002              | 0.0005             | *      | *   | NS   | NS                 | NS    | **  | NS      |
| <i>Butyrivibrio fibrisolvens</i>    | 0.047                 | 0.053              | 0.004              | 0.058                | 0.041              | 0.005              | 0.039              | 0.060              | 0.005              | NS     | *** | ***  | NS                 | NS    | *** | NS      |
| <i>Butyrivibrio proteoclasticus</i> | 0.013                 | 0.013              | 0.002              | 0.016                | 0.011              | 0.003              | 0.011              | 0.015              | 0.002              | NS     | *   | *    | NS                 | NS    | **  | NS      |
| <i>Ruminococcus flavefaciens</i>    | 9×10 <sup>-4</sup>    | 7×10 <sup>-4</sup> | 2×10 <sup>-4</sup> | 1.3×10 <sup>-3</sup> | 3×10 <sup>-4</sup> | 2×10 <sup>-4</sup> | 5×10 <sup>-4</sup> | 1×10 <sup>-3</sup> | 3×10 <sup>-4</sup> | NS     | *** | *    | NS                 | NS    | *   | NS      |
| <i>Fibrobacter succinogenes</i>     | 0.016                 | 0.011              | 0.003              | 0.011                | 0.016              | 0.003              | 0.016              | 0.012              | 0.003              | t      | *   | t    | NS                 | NS    | NS  | NS      |
| <i>Ruminococcus albus</i>           | 5×10 <sup>-4</sup>    | 3×10 <sup>-4</sup> | 1×10 <sup>-4</sup> | 5×10 <sup>-4</sup>   | 3×10 <sup>-4</sup> | 1×10 <sup>-4</sup> | 3×10 <sup>-4</sup> | 5×10 <sup>-4</sup> | 1×10 <sup>-4</sup> | t      | *   | *    | NS                 | *     | **  | NS      |
| <i>Ruminobacter amylophilus</i>     | 0.046                 | 0.023              | 0.010              | 0.025                | 0.044              | 0.014              | 0.044              | 0.025              | 0.012              | NS     | NS  | t    | NS                 | NS    | NS  | NS      |
| <i>Streptococcus bovis</i>          | 2×10 <sup>-6</sup>    | 2×10 <sup>-6</sup> | 1×10 <sup>-6</sup> | 4×10 <sup>-6</sup>   | 4×10 <sup>-7</sup> | 1×10 <sup>-6</sup> | 1×10 <sup>-6</sup> | 3×10 <sup>-6</sup> | 1×10 <sup>-6</sup> | NS     | *** | *    | NS                 | NS    | **  | NS      |
| <i>Selenomonas ruminantium</i>      | 0.009                 | 0.011              | 0.001              | 0.010                | 0.009              | 0.001              | 0.009              | 0.011              | 0.001              | t      | NS  | *    | NS                 | NS    | *   | NS      |
| <i>Prevotella</i> spp               | 0.114                 | 0.123              | 0.008              | 0.113                | 0.123              | 0.011              | 0.105              | 0.131              | 0.011              | NS     | NS  | *    | NS                 | NS    | NS  | NS      |
| <i>Prevotella ruminicola</i>        | 0.046                 | 0.053              | 0.004              | 0.047                | 0.051              | 0.005              | 0.044              | 0.055              | 0.006              | NS     | NS  | NS   | ***                | NS    | NS  | NS      |
| <i>Prevotella brevis</i>            | 0.041                 | 0.039              | 0.006              | 0.025                | 0.054              | 0.007              | 0.034              | 0.045              | 0.008              | NS     | **  | NS   | NS                 | NS    | NS  | NS      |
| <i>Methanospaera stadtmanae</i>     | 0.001                 | 0.001              | 0.0002             | 0.001                | 0.001              | 0.0002             | 0.001              | 0.001              | 0.0002             | NS     | NS  | *    | NS                 | NS    | *   | NS      |
| <i>Methanobrevibacter</i> spp.      | 0.001                 | 0.002              | 0.0002             | 0.002                | 0.001              | 0.0003             | 0.001              | 0.002              | 0.0003             | NS     | *** | ***  | NS                 | NS    | *** | NS      |
| Methanobacteriales                  | 0.001                 | 0.002              | 0.0001             | 0.002                | 0.001              | 0.0002             | 0.001              | 0.002              | 0.0002             | ***    | *   | ***  | NS                 | *     | **  | NS      |

\* p < 0.05, \*\* p < 0.01, \*\*\* p < 0.001, t = trend p < 0.10.<sup>a</sup> SEM: Standard error of the means. 20HF (n = 11 goats): 20g *Schizochytrium* spp and high forage diet (60:40); 20HG (n = 11 goats): 20g *Schizochytrium* spp and high grain diet (40:60); 40HF (n = 11 goats): 40g *Schizochytrium* spp and high forage diet (60:40); 40HG (n = 11 goats): 40g *Schizochytrium* spp and high grain diet (40:60).

**Table S6.** The mean individual fatty acids (FA) (% of total FA) in rumen fluid of goats fed diets (20HF, 20HG, 40HF, and 40HG) with different levels of microalgae *Schizochytrium* spp (20 g and 40 g/day/goat) and two different forage to concentrate ratios (60:40 and 40:60) throughout the experimental period (21th and 42th experimental day) investigating the three major factors (forage-to-concentrate ratio, algae level, and sampling time).

|                                  | Dietary treatment (D) |                    |                  |                    |                    |                  | Sampling time (S) |                   |                  | Effect |     |      |                    |       |     |         |
|----------------------------------|-----------------------|--------------------|------------------|--------------------|--------------------|------------------|-------------------|-------------------|------------------|--------|-----|------|--------------------|-------|-----|---------|
|                                  | Forage/Concentrate    |                    |                  | Algae level        |                    |                  | Sampling day      |                   |                  | Effect |     |      | Interaction effect |       |     |         |
|                                  | 60/40                 | 40/60              | SEM <sup>a</sup> | 20g                | 40g                | SEM <sup>a</sup> | 21                | 42                | SEM <sup>a</sup> | F/C    | ALG | TIME | AxF/C              | TxF/C | AxT | AxTxF/C |
| C <sub>6:0</sub>                 | 1.09                  | 1.08               | 0.164            | 0.458 <sup>a</sup> | 1.72 <sup>b</sup>  | 0.185            | 1.10              | 1.08              | 0.204            | NS     | *** | NS   | NS                 | **    | NS  | NS      |
| C <sub>8:0</sub>                 | 1.97                  | 1.60               | 0.192            | 1.63               | 1.95               | 0.222            | 1.95              | 1.63              | 0.219            | NS     | t   | t    | NS                 | ***   | **  | NS      |
| C <sub>10:0</sub>                | 1.11                  | 1.12               | 0.103            | 0.858 <sup>a</sup> | 1.37 <sup>b</sup>  | 0.126            | 1.09              | 1.14              | 0.144            | NS     | *** | NS   | NS                 | NS    | NS  | NS      |
| C <sub>12:0</sub>                | 0.751 <sup>a</sup>    | 1.02 <sup>b</sup>  | 0.074            | 0.681 <sup>a</sup> | 1.09 <sup>b</sup>  | 0.118            | 0.976             | 0.791             | 0.107            | *      | **  | NS   | NS                 | NS    | NS  | NS      |
| C <sub>14:0</sub>                | 4.22                  | 4.10               | 0.159            | 3.55 <sup>a</sup>  | 4.77 <sup>b</sup>  | 0.210            | 4.45 <sup>a</sup> | 3.87 <sup>b</sup> | 0.214            | NS     | *** | *    | **                 | NS    | NS  | **      |
| C <sub>14:1</sub>                | 1.13                  | 1.03               | 0.065            | 1.10               | 1.06               | 0.069            | 1.14 <sup>a</sup> | 1.02 <sup>b</sup> | 0.071            | NS     | NS  | *    | NS                 | NS    | NS  | NS      |
| C <sub>15:0</sub>                | 1.11 <sup>a</sup>     | 0.909 <sup>b</sup> | 0.066            | 0.991              | 1.03               | 0.070            | 1.03              | 0.993             | 0.074            | *      | NS  | NS   | NS                 | NS    | NS  | NS      |
| C <sub>16:0</sub>                | 28.51                 | 28.69              | 0.239            | 28.21 <sup>a</sup> | 28.99 <sup>b</sup> | 0.299            | 28.39             | 28.81             | 0.312            | NS     | **  | NS   | NS                 | NS    | NS  | NS      |
| C <sub>16:1 n-7</sub>            | 0.518                 | 0.581              | 0.077            | 0.468 <sup>a</sup> | 0.631 <sup>b</sup> | 0.089            | 0.617             | 0.482             | 0.088            | NS     | *   | t    | NS                 | NS    | NS  | NS      |
| C <sub>17:0</sub>                | 0.871                 | 0.695              | 0.114            | 0.570 <sup>a</sup> | 0.996 <sup>b</sup> | 0.131            | 0.849             | 0.717             | 0.148            | NS     | *** | NS   | NS                 | NS    | *   | NS      |
| C <sub>18:0</sub>                | 15.98                 | 11.60              | 2.264            | 19.26 <sup>a</sup> | 8.33 <sup>b</sup>  | 2.667            | 13.68             | 13.90             | 2.308            | NS     | *** | NS   | NS                 | NS    | **  | NS      |
| C <sub>18:1 trans</sub>          | 1.86                  | 1.99               | 0.134            | 1.89               | 1.96               | 0.212            | 1.84              | 2.01              | 0.156            | NS     | NS  | NS   | NS                 | NS    | NS  | NS      |
| C <sub>18:1 trans 11</sub>       | 10.97 <sup>a</sup>    | 18.67 <sup>b</sup> | 2.045            | 12.92              | 16.71              | 2.444            | 14.76             | 14.88             | 2.065            | *      | t   | NS   | NS                 | NS    | NS  | NS      |
| C <sub>18:1 trans 10</sub>       | 1.18                  | 1.54               | 0.121            | 1.33               | 1.39               | 0.163            | 1.34              | 1.38              | 0.129            | t      | NS  | NS   | NS                 | NS    | NS  | NS      |
| C <sub>18:1 cis-9</sub>          | 9.56 <sup>a</sup>     | 10.78 <sup>b</sup> | 0.402            | 10.20              | 10.15              | 0.484            | 10.18             | 10.16             | 0.465            | *      | NS  | NS   | NS                 | NS    | *   | NS      |
| C <sub>18:2 n-6 trans</sub>      | 0.745                 | 0.640              | 0.072            | 0.795 <sup>a</sup> | 0.590 <sup>b</sup> | 0.094            | 0.737             | 0.648             | 0.083            | NS     | *   | NS   | NS                 | **    | *   | **      |
| C <sub>18:2 n-6 cis</sub>        | 4.14                  | 3.56               | 0.222            | 4.69 <sup>a</sup>  | 3.01 <sup>b</sup>  | 0.257            | 3.83              | 3.87              | 0.250            | t      | *** | NS   | NS                 | NS    | NS  | NS      |
| C <sub>18:3 n-3</sub>            | 1.40 <sup>a</sup>     | 0.887 <sup>b</sup> | 0.110            | 1.03               | 1.25               | 0.138            | 1.16              | 1.12              | 0.120            | **     | t   | NS   | NS                 | NS    | *   | NS      |
| C <sub>18:2 cis-9,trans-11</sub> | 1.23 <sup>a</sup>     | 0.965 <sup>b</sup> | 0.080            | 1.23 <sup>a</sup>  | 0.971 <sup>b</sup> | 0.103            | 1.00 <sup>a</sup> | 1.19 <sup>b</sup> | 0.097            | *      | *   | *    | NS                 | NS    | NS  | NS      |
| C <sub>20:3 n-3</sub>            | 0.022                 | 0.059              | 0.019            | 0.071 <sup>a</sup> | 0.010 <sup>b</sup> | 0.024            | 0.032             | 0.049             | 0.025            | NS     | *   | NS   | NS                 | *     | NS  | **      |
| C <sub>22:5 n-6</sub>            | 3.41 <sup>a</sup>     | 2.62 <sup>b</sup>  | 0.131            | 2.36 <sup>a</sup>  | 3.67 <sup>b</sup>  | 0.185            | 2.96              | 3.07              | 0.161            | ***    | *** | NS   | *                  | NS    | NS  | NS      |
| C <sub>22:6 n-3</sub>            | 8.19 <sup>a</sup>     | 5.80 <sup>b</sup>  | 0.322            | 5.66 <sup>a</sup>  | 8.33 <sup>b</sup>  | 0.433            | 6.88              | 7.11              | 0.395            | ***    | *** | NS   | NS                 | NS    | NS  | NS      |

\* p < 0.05, \*\* p < 0.01, \*\*\* p < 0.001, t = trend p < 0.10.

<sup>a</sup> SEM: Standard error of the means.

20HF (n = 11 goats): 20g *Schizochytrium* spp and high forage diet (60:40); 20HG (n = 11 goats): 20g *Schizochytrium* spp and high grain diet (40:60); 40HF (n = 11 goats): 40g *Schizochytrium* spp and high forage diet (60:40); 40HG (n = 11 goats): 40g *Schizochytrium* spp and high grain diet (40:60).

**Table S7.** The mean rumen pH values, ammonia concentration, a-amylase, protease, cellulase, and xylanase activity of goats fed diets (20HF, 20HG, 40HF, and 40HG) with different levels of microalgae *Schizochytrium spp* (20 g and 40 g/day/goat) and two different forage to concentrate ratios (60:40 and 40:60) throughout the experimental period (21<sup>th</sup> and 42<sup>th</sup> experimental day) using a GLM model for three-way repeated measures.

|                                          | Dietary treatment (D) |       |                  |             |       |                  | Sampling time (S) |       |                  | Effect |     |      |                    |       |     |         |
|------------------------------------------|-----------------------|-------|------------------|-------------|-------|------------------|-------------------|-------|------------------|--------|-----|------|--------------------|-------|-----|---------|
|                                          | Forage/Concentrate    |       |                  | Algae level |       |                  | Sampling day      |       |                  | Effect |     |      | Interaction effect |       |     |         |
|                                          | 60/40                 | 40/60 | SEM <sup>a</sup> | 20g         | 40g   | SEM <sup>1</sup> | 21                | 42    | SEM <sup>1</sup> | F/C    | ALG | TIME | F/C×A              | F/C×T | A×T | F/C×A×T |
| Protease activity (U/ml) <sup>a</sup>    | 0.043                 | 0.041 | 0.008            | 0.038       | 0.047 | 0.010            | 0.053             | 0.032 | 0.009            | NS     | NS  | *    | NS                 | NS    | NS  | NS      |
| a-Amylase activity (U/ml) <sup>b</sup>   | 2.53                  | 3.12  | 0.225            | 3.14        | 2.51  | 0.268            | 2.95              | 2.70  | 0.253            | t      | **  | NS   | t                  | NS    | NS  | NS      |
| Cellulase activity (U/ml/h) <sup>c</sup> | 8.70                  | 9.57  | 0.294            | 8.76        | 9.51  | 0.356            | 9.20              | 9.07  | 0.331            | *      | *   | NS   | NS                 | NS    | NS  | NS      |
| Xylanase (U/ml/h) <sup>d</sup>           | 7.73                  | 8.54  | 0.215            | 8.08        | 8.19  | 0.266            | 8.22              | 8.05  | 0.255            | *      | NS  | NS   | NS                 | NS    | NS  | NS      |
| NH3-N mg/L                               | 148.3                 | 120.8 | 9.73             | 137.6       | 131.5 | 10.55            | 141.5             | 127.6 | 10.49            | *      | NS  | *    | NS                 | NS    | NS  | NS      |
| pH                                       | 6.77                  | 6.70  | 0.101            | 6.76        | 6.71  | 0.125            | 6.73              | 6.74  | 0.099            | NS     | NS  | NS   | NS                 | NS    | NS  | NS      |

\* p < 0.05, \*\* p < 0.01, \*\*\* p < 0.001, t = trend p < 0.10.

<sup>1</sup> SEM: Standard error of the means.

<sup>a</sup> Units/ml= [(μmole of protein equivalent to ABS) x (total volume of reaction in ml) x dilution factor] / [(incubation time in minutes) x (volume of colorimetric determination in ml) x (volume of rumen sample in ml)]

<sup>b</sup> One unit of α-amylase activity will liberate 1.0 mg of maltose from starch in 10 min at pH 6.9 at 39°C

<sup>c</sup> One unit of cellulase activity based on endo-cellulase (*A. niger*) clearance activity in 24h incubation at 50°C.

<sup>d</sup> One unit of xylanase activity based on endo-1-4-beta-Xylanase M1 (*T. viride*) clearance activity in 24h incubation at 37°C.

**Table S8.** The mean rumen pH values, ammonia concentration,  $\alpha$ -amylase, protease, cellulase, and xylanase activity of goats fed diets (20HF, 20HG, 40HF, and 40HG) with different levels of microalgae *Schizochytrium spp* (20 g and 40 g/day/goat) and two different forage to concentrate ratios (60:40 and 40:60) throughout the experimental period (21<sup>th</sup> and 42<sup>th</sup> experimental day).

|                                                | Dietary treatment (D) |                     |                      |                     | Sampling time (S) |                     |                     | Effect           |    |    |       |
|------------------------------------------------|-----------------------|---------------------|----------------------|---------------------|-------------------|---------------------|---------------------|------------------|----|----|-------|
|                                                | 20HF                  | 20HG                | 40HF                 | 40HG                | SEM <sup>1</sup>  | 21                  | 42                  | SEM <sup>1</sup> | D  | T  | D x T |
| Protease activity (U/ml) <sup>a</sup>          | 0.039                 | 0.036               | 0.040                | 0.046               | 0.010             | 0.049               | 0.031               | 0.007            | NS | t  | NS    |
| $\alpha$ -Amylase activity (U/ml) <sup>b</sup> | 2.62 <sup>b</sup>     | 3.65 <sup>a</sup>   | 2.41 <sup>b</sup>    | 2.58 <sup>b</sup>   | 0.263             | 2.94                | 2.69                | 0.151            | ** | NS | NS    |
| Cellulase activity (U/ml/h) <sup>c</sup>       | 8.09 <sup>a</sup>     | 9.44 <sup>b</sup>   | 8.86 <sup>ab</sup>   | 9.71 <sup>b</sup>   | 0.330             | 9.02                | 9.02                | 0.198            | ** | NS | NS    |
| Xylanase (U/ml/h) <sup>d</sup>                 | 7.55 <sup>a</sup>     | 8.62 <sup>b</sup>   | 7.84 <sup>a</sup>    | 8.47 <sup>b</sup>   | 0.266             | 8.21                | 8.03                | 0.152            | *  | NS | NS    |
| NH <sub>3</sub> -N mg/L                        | 155.95 <sup>a</sup>   | 119.29 <sup>b</sup> | 140.73 <sup>ab</sup> | 122.26 <sup>b</sup> | 10.366            | 141.19 <sup>a</sup> | 127.93 <sup>b</sup> | 5.993            | *  | *  | NS    |
| pH                                             | 6.75                  | 6.77                | 6.79                 | 6.63                | 0.125             | 6.75                | 6.69                | 0.099            | NS | NS | NS    |

Means with different superscript letters (a, b) between dietary groups and sampling time differ significantly; \*  $p < 0.05$ , \*\*  $p < 0.01$ , \*\*\*  $p < 0.001$ , t = trend  $p < 0.10$ .

<sup>1</sup> SEM: Standard error of the means.

<sup>a</sup> Units/ml= [( $\mu$ mole of protein equivalent to ABS) x (total volume of reaction in ml) x dilution factor] / [(incubation time in minutes) x (volume of colorimetric determination in ml) x (volume of rumen sample in ml)]

<sup>b</sup> One unit of  $\alpha$ -amylase activity will liberate 1.0 mg of maltose from starch in 10 min at pH 6.9 at 39°C

<sup>c</sup> One unit of cellulase activity based on endo-cellulase (*A. niger*) clearance activity in 24h incubation at 50°C.

<sup>d</sup> One unit of xylanase activity based on endo-1-4-beta-Xylanase M1 (*T. viride*) clearance activity in 24h incubation at 37°C.
